# Supplementary material
Source: publisher site journal article supplement (https://www.dovepress.com/article/438174)
Supplement: Supplementary file 1 [file get_supplementary_file.php]

# Supplementary Materials

## Table S1. Questions in chart review form for selected variables used in the study

| Selected study variables | Question in chart review form |
| --- | --- |
| Time since sarcoidosis diagnosis | When was the patient diagnosed with sarcoidosis? ___/_____ mm/yyyy |
| Comorbid conditions | Has the patient been diagnosed with any of the following types of comorbid conditions?  [A list of comorbid conditions was provided with the additional options of “other” and “Patient has no co-morbid conditions”] |
| Site of extrapulmonary site involvement | Which organs are involved, if any (beyond the lungs)  [A list of organs was provided with the option of “No other organs beyond the lungs”] |
| Sign and symptoms | Which symptoms did the patient have when initiating the most recent course of Acthar? Indicate the severity of each symptom. [List of organs was provided with the option of “other”]  Severity was assessed as 1 = mild 2 = moderate 3 = severe |
| Glucocorticoid use any time before Acthar Gel initiation | Did the patient receive >5mg/day of prednisone for longer than 6 months? Assessed as 1 = yes 2 = no |
| Use of Acthar Gel | Is this the first, second, third, etc. time this patient has been placed on an Acthar regimen? |
| Completion of the Acthar Gel course | What were the dates of administration of the most recent course of Acthar for SYMPTOMATIC sarcoidosis?  [Completion or continuation was assessed on the dates captured from patient charts] |
| Time on Acthar Gel | What were the dates of administration of the most recent course of Acthar for SYMPTOMATIC sarcoidosis? |
| Acthar Gel dosing | Provide dosing and regimen details specific to the most recent treatment with Repository Corticotropin Injection  [Date, dose, frequency, and status were assessed] |
| Acthar Gel dose adjustments | What happened to this dose?  1 = discontinuation of Acthar at this dose  2 = decreased dose/frequency  3 = increased dose/frequency  4 = tapered dose for discontinuation |
| Co-medication use | What treatment classes has the patient tried for SYMPTOMATIC sarcoidosis?  [A list of medications was provided with the option of “other”]  The medication use was captured at 3 different time points: During the 3 months PRIOR TO Acthar prescribed, WITH Acthar prescribed, and Within the 3 months AFTER Acthar |
| Prednisone dose | Did this patient receive the following specific medications before, during or after Acthar treatment?  [prednisone, assessed as 1 = yes 2 = no]  If yes, Average daily dose of prednisone immediately prior to Acthar (mg/day) and Average daily dose of prednisone immediately after Acthar (mg/day) |
| Improvement in patient’s health status | What is the patient’s status as of the end of Acthar therapy, or the 6 months point in therapy for ongoing treatment patients?  [1 = improved, 2 = not improved] |
| Physicians’ assessments of improvement with Acthar Gel treatment | Please select the outcomes below that have improved as a result of Acthar treatment  [A list of outcomes was provided with an option of “other”] |
